ORIGINAL ARTICLE

# CDKN2A Loss Is Associated With Shortened Overall Survival in Lower-Grade (World Health Organization Grades II–III) Astrocytomas

Gerald F. Reis, MD, PhD, Melike Pekmezci, MD, Helen M. Hansen, BA, Terri Rice, MPH, Roxanne E. Marshall, BS, Annette M. Molinaro, PhD, Joanna J. Phillips, MD, PhD, Hannes Vogel, MD, John K. Wiencke, PhD, Margaret R. Wrensch, MPH, PhD, Kyle M. Walsh, PhD, and Arie Perry, MD

## Abstract

Lower-grade (World Health Organization Grades II and III) gliomas vary widely in clinical behavior and are classified as astrocytic, oligodendroglial, or mixed. Anaplasia depends greatly on mitotic activity, with *CDKN2A* loss considered as the most common mechanism for cell cycle dysregulation. We investigated whether loss of the *CDKN2A* gene is associated with overall survival across pathologically and genetically defined glioma subtypes. After adjustment for *IDH* mutation, sex, and age, *CDKN2A* deletion was strongly associated with poorer overall survival in astrocytomas but not in oligodendrogliomas or oligoastrocytomas. Molecular classification

of astrocytomas by *IDH* mutation, *TP53* mutation, and /or *ATRX* loss of expression revealed that *CDKN2A* loss in *IDH/TP53* mutated tumors was strongly associated with worse overall survival. *CDKN2A* loss in *IDH* mutated tumors with *ATRX* loss was only weakly associated with worse overall survival. These findings suggest that *CDKN2A* testing may provide further clinical aid in lower-grade glioma substratification beyond *IDH* mutation and 1p19q codeletion status, particularly in *IDH/TP53* mutated astrocytomas.

**Key Words:** Astrocytoma, *ATRX*, Biomarker, *CDKN2A*, *IDH*, Infiltrating glioma, Oligodendroglioma, p16, *TP53*.

From the Departments of Neurology, Pediatrics, and Neurosurgery, Stanford University School of Medicine, Stanford (HV); Department of Anatomic Pathology, University of California San Francisco Medical School (GFR, MP, AP); Division of Neuroepidemiology (HMH, TR, JKW, MRW, KMW), Departments of Neurological Surgery (REM, AMM, JJP, AP) and Epidemiology and Biostatistics (AMM); and Institute for Human Genetics, University of California San Francisco (JKW, MRW, KMW), San Francisco, California.

Send correspondence and reprint requests to: Arie Perry, MD, Department of Pathology, University of California San Francisco Medical School, Box 0102, 505 Parnassus Ave, San Francisco, CA 94143-0102; E-mail: arie.perry@ucsf.edu

John K. Wiencke, Margaret R. Wrensch, Kyle M. Walsh, and Arie Perry are co-senior authors.

Work at University of California San Francisco was supported by the National Institutes of Health (Grant Nos. R01CA52689, P50CA097257, R01CA126831, R01CA139020, and R25CA112355), National Brain Tumor Foundation, Stanley D. Lewis and Virginia S. Lewis Endowed Chair in Brain Tumor Research, and Robert Magnin Newman Endowed Chair in Neuro-oncology, and by donations from families and friends of John Berardi, Helen Glaser, Elvera Olsen, Raymond E. Cooper, and William Martinusen. This publication was also supported by the National Center for Research Resources and the National Center for Advancing Translational Sciences, National Institutes of Health, through University of California San Francisco Clinical and Translational Science Institute (Grant No. UL1 RR024131).

The contents of this article are solely the responsibility of the authors and do not necessarily represent the official views of the National Institutes of Health. The ideas and opinions expressed herein are those of the authors. Endorsement by the State of California Department of Public Health, the National Cancer Institute, and the Centers for Disease Control and Prevention, or by their contractors and subcontractors, is neither intended nor inferred.

Supplemental digital content is available for this article. Direct URL citations appear in the printed text and are provided in the HTML and PDF versions of this article on the journal's Web site ([www.jneuropath.com](http://www.jneuropath.com)).

## INTRODUCTION

Infiltrating gliomas account for approximately 60% of primary malignant intracranial tumors (1) and have a devastating course given their widespread invasiveness, tendency toward biologic progression, and resistance to available adjuvant therapies. The World Health Organization (WHO) classifies infiltrating gliomas as follows: diffuse (WHO Grade II) astrocytoma (A-II), diffuse (WHO Grade II) oligodendroglioma (O-II), diffuse (WHO Grade II) oligoastrocytoma (OA-II), anaplastic (WHO Grade III) astrocytoma (A-III), anaplastic (WHO Grade III) oligodendroglioma (O-III), anaplastic (WHO Grade III) oligoastrocytoma (OA-III), and glioblastoma multiforme (WHO Grade IV) (2). Although diagnostic reproducibility among neuropathologists is high for glioblastoma multiforme, there is far lower concordance for cell type determination in other subtypes and in the distinction between WHO Grade II and WHO Grade III. The latter difficulty stems in part from different grading criteria for astrocytic and oligodendroglial tumors, vagaries in WHO grading criteria, and interobserver variability in the detection of mitotic figures and microvascular proliferation. In addition, although molecular criteria for more objectively distinguishing diffuse astrocytomas from oligodendrogliomas in adult patients have been published recently, it remains unclear whether previously devised grading criteria based solely on morphology can be appropriately applied to newly defined glioma subtypes based mostly on molecular definitions (3). As such, the development of clinically useful “grading” biomarkers for molecularly defined glioma subsets is sorely needed to improve diagnostic reproducibility.

Most Grade II and Grade III gliomas, as well as so-called secondary glioblastoma multiforme derived from lower-grade gliomas, harbor mutations in the *IDH* gene, with *IDH1* being most common (4–7). Mutations in *TP53* and *ATRX* also occur frequently and are present in approximately 60% to 70% of tumors of astrocytic differentiation (2). In a recent study of lower-grade gliomas, *ATRX* mutation was closely associated with *TP53* mutation and was restricted to *IDH* mutated tumors (8). Consequences of *ATRX* mutation include activation of the alternative lengthening of telomeres pathway and telomerase-independent immortalization of tumor cells (9, 10). Conversely, approximately 70% of oligodendrogliomas harbor 1p19q codeletion and lack *TP53* and *ATRX* alterations (2, 8, 11–14). Approximately 80% of oligodendrogliomas have mutations in the *TERT* gene promoter, which reactivates telomerase activity (15). Mixed oligoastrocytomas remain poorly defined molecularly, with most showing classic molecular features of either astrocytoma or oligodendroglioma (16).

In addition to the alterations described previously, homozygous and hemizygous losses involving 9p21 have been observed at high frequency in infiltrating gliomas, with homozygous loss being most common (17–20). One of the consequences of 9p21 deletion is loss of the cyclin-dependent kinase inhibitor *CDKN2A* gene, which results in cellular proliferation and dysregulation of proapoptotic pathways (21). Cell cycle progression from G1 phase to S phase relies on complex formation between cyclin-dependent kinases (CDK4 or CDK6) and D-type cyclins, which subsequently leads to phosphorylation of retinoblastoma (RB1) protein, release of elongation factor (EF2) transcriptional factor, and activation of genes involved in G1-to-S transition (22, 23). Alterations in this pathway seem to be rare in Grade II gliomas but are frequent in higher-grade (Grades III and IV) tumors, suggesting a key role for the *CDKN2A*-CDK4-RB pathway in malignant progression (24–26). Because the main criterion for anaplastic designation in gliomas is either the presence of mitoses (astrocytomas) or high mitotic activity (oligodendroglial tumors), loss of the *CDKN2A* gene or p16 protein (*CDKN2A* product) seems to be an ideal candidate for distinguishing the molecular phenotypes of WHO Grade II and Grade III gliomas.

Several studies have reported worse prognosis for *CDKN2A* loss in gliomas (27–33). However, these studies were conducted before the realization that *IDH* mutation is an independent favorable prognostic factor in adult-type diffuse gliomas (6, 34, 35). Therefore, it is unclear whether *CDKN2A* loss remains a statistically significant prognostic factor after correcting for the effects of *IDH* mutation. Furthermore, prior studies have not explored the effects of *CDKN2A* loss on newly defined “molecular” Grade II to Grade III astrocytomas (i.e. *IDH* mutated, *TP53* mutated, and often with associated loss of *ATRX* protein expression) or “molecular” Grade II to Grade III oligodendrogliomas (i.e. *IDH* mutated and 1p19q codeleted). Our study addresses these questions by testing the hypothesis that *CDKN2A* loss determined by fluorescence in situ hybridization (FISH) and/or loss of p16 protein expression determined by immunohistochemistry (IHC) can enhance prognostication of overall survival in molecularly character-

ized lower-grade (WHO Grades II and III) adult-type diffuse gliomas. If so, these molecular biomarkers could potentially enhance future WHO grading criteria and improve interobserver concordance rates among pathologists.

## MATERIALS AND METHODS

### Study Participants and Selection Criteria

Cases were selected from among participants of the San Francisco Bay Area Adult Glioma Study (AGS), which was conducted at the University of California San Francisco (UCSF), as previously described (36, 37). Briefly, the AGS enrolled patients who were newly diagnosed as having a histologically confirmed glioma at age 18 years or older between 1991 and 2012. All participants gave a written informed consent form, and the study was conducted under protocols approved by the UCSF Institutional Review Board.

The following criteria were used to select cases from the AGS for this analysis: Only cases classified as Grade II or Grade III astrocytoma, oligodendroglioma, or oligoastrocytoma

**TABLE 1.** Distribution of Histologic Subtype, Pathologic Diagnosis, Demographic Characteristics, and Clinical Characteristics of Patients With Glioma From the UCSF AGS

|                                      | n (%)       | Age (years) |     |        |
|--------------------------------------|-------------|-------------|-----|--------|
|                                      |             | Mean        | SE  | Median |
| All cases                            | 270 (100.0) | 42.2        | 0.7 | 41.0   |
| Histology                            |             |             |     |        |
| Astrocytoma                          | 113 (41.9)  | 42.4        | 1.3 | 41.0   |
| Oligodendroglioma                    | 104 (38.5)  | 44.5        | 1.0 | 44.5   |
| Oligoastrocytoma                     | 53 (19.6)   | 36.9        | 1.3 | 36.0   |
| Pathology                            |             |             |     |        |
| Diffuse astrocytoma (A-II)           | 49 (18.2)   | 41.4        | 1.9 | 40.0   |
| Anaplastic astrocytoma (A-III)       | 64 (23.7)   | 43.2        | 1.8 | 41.5   |
| Oligodendroglioma (O-II)             | 80 (29.6)   | 43.9        | 1.2 | 44.0   |
| Anaplastic oligodendroglioma (O-III) | 24 (8.9)    | 46.8        | 2.0 | 51.0   |
| Oligoastrocytoma (OA-II)             | 42 (15.6)   | 37.7        | 1.6 | 36.0   |
| Anaplastic oligoastrocytoma (OA-III) | 11 (4.1)    | 34.1        | 2.4 | 32.0   |
| Sex                                  |             |             |     |        |
| Male                                 | 147 (54.4)  |             |     |        |
| Female                               | 123 (45.6)  |             |     |        |
| Surgery                              |             |             |     |        |
| Biopsy                               | 20 (7.4)    |             |     |        |
| Resection                            | 250 (92.6)  |             |     |        |
| Adjunct therapy                      |             |             |     |        |
| Chemotherapy                         |             |             |     |        |
| No                                   | 107 (40.7)  |             |     |        |
| Yes                                  | 154 (58.6)  |             |     |        |
| Unknown                              | 2 (0.8)     |             |     |        |
| Temozolomide                         | 129 (47.8)  |             |     |        |
| Radiotherapy                         |             |             |     |        |
| No                                   | 127 (47.0)  |             |     |        |
| Yes                                  | 143 (53.0)  |             |     |        |
| Outcome                              |             |             |     |        |
| Alive                                | 165 (61.1)  |             |     |        |
| Dead                                 | 105 (38.9)  |             |     |        |

## A. Intact status

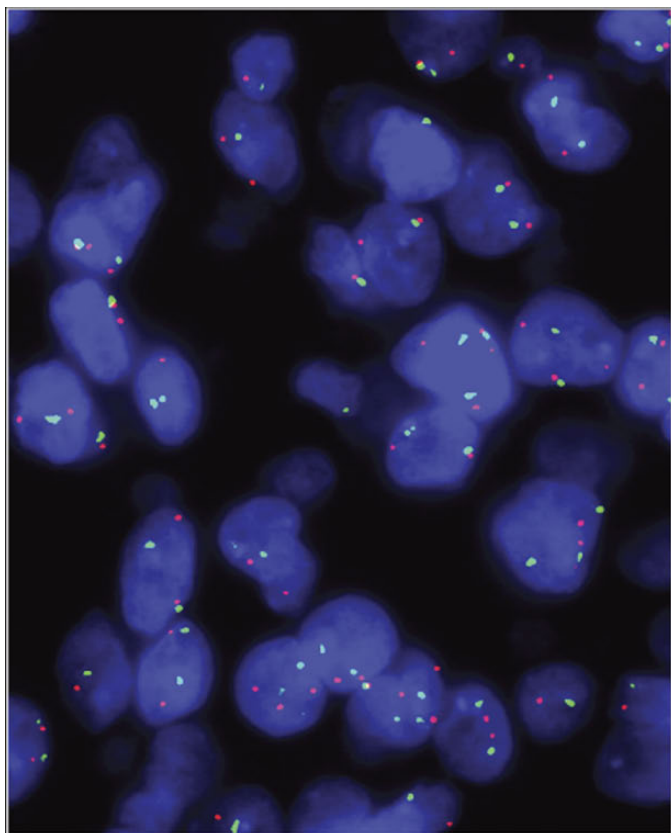

## B. Deleted status

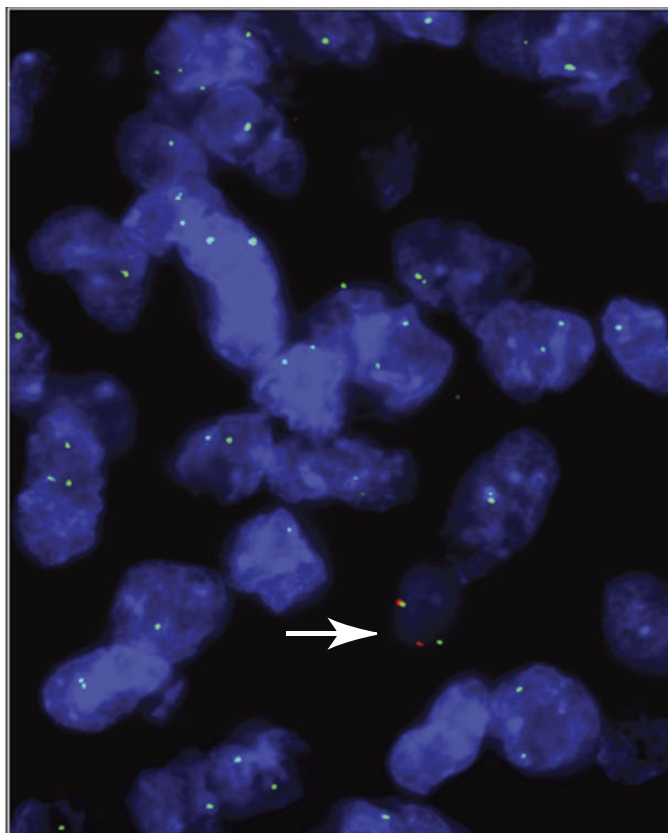

**FIGURE 1.** Results of FISH demonstrating intact (**A**) (CEP9-to-*CDKN2A* ratio near 1) and deleted (**B**) *CDKN2A* status. In the latter case, a nonneoplastic cell containing 2 green CEP9 signals and 2 red *CDKN2A* signals is seen (white arrow), whereas all tumor cells have only CEP9 signals.

during the study's neuropathology review were included. In addition, only cases with sufficient available tissue for the planned assays were included. Because these subjects were also a subset of another study relating tumor markers to inherited single nucleotide polymorphism data, subjects were of European ancestry and had constitutive DNA available. Cases were prioritized with respect to available mutational status for isocitrate dehydrogenase (*IDH1* or *IDH2*) obtained by DNA sequencing, as previously described (37, 38). Tumor *TP53* mutation was also available for many of the subjects and assayed as described previously (39).

### FISH Analysis

We assessed *CDKN2A* copy number alterations by FISH using commercially available probes (LSI *CDKN2A* [9p21] orange and CEP9 green spectra; Abbott Laboratories, North Chicago, IL). In brief, green and orange fluorescence microscope with appropriate filters (Olympus, Melville, NY). One hundred nonoverlapping nuclei were assessed for numbers of green and red signals, and cases were considered deleted regardless of whether the pattern suggested hemizygous or homozygous loss. An interpretation of deletion was made when the orange-to-green ratio was less than 0.8. Partial hybridization failure was ruled out by evaluating orange and

green signals within vascular endothelial cells as internal control. Failed or weak hybridizations were repeated; uninterpretable cases were considered "noninformative." Interpretable results were available for 253 cases (93.7%).

Fluorescence in situ hybridization images were captured using a black-and-white high-resolution COHU CCD camera, a Z-stack motor, and a CytoVision basic workstation (Applied Imaging, Santa Clara, CA) with sequential DAPI (1 level), fluorescein isothiocyanate (5 levels), and rhodamine (5 levels) filter settings. Resulting images were reconstituted with blue, green, and orange pseudocolors using CytoVision software.

1p19q deletion status was assayed according to published methods (40, 41). Tumors classified histologically as astrocytoma were not assayed for 1p19q deletion.

### Immunohistochemistry

Immunohistochemistry for ATRX and p16 was performed at the Brain Tumor Research Center and Clinical Immunohistochemistry Laboratories, UCSF, using an automated staining processor (Ventana, Tucson, AZ). ATRX loss of expression was assessed using rabbit polyclonal antibody (HPA001906, 1:100; Sigma, St Louis, MO). Only cases with retained staining of endothelial cells (internal positive control) were considered interpretable. For p16 expression, Mtm Lab



kit (Ventana) and JC8 mouse antibody (1:100; Santa Cruz Biotechnology, Dallas, TX) were used, with most cases evaluated using the Mtm Lab kit. Quantitative analysis of staining pattern for 10 cases, using both antibodies, demonstrated a high correlation ( $r^2 = 0.8$ ,  $p = 0.0004$ ). Nuclear staining was required for a positive p16 result.

Image acquisition for p16 quantification was performed using an Olympus BX41 microscope (20× objective) and an Olympus DP72 digital camera. Areas of maximal staining were photographed to assess labeling index. JPEG images were imported into ImageJ (<http://imagej.nih.gov/ij/>), and ImmunoRatio plug-in (<http://153.1.200.58/sites/default/files/software/immunoratio-plugin/index.html>) was used to determine labeling index. Approximately 1,000 cells were required for an interpretable result.

### Statistics and Survival Analysis

Comparisons among categorical variables were made using chi-square test and Fisher exact test. Cox proportional hazards regression was used to estimate overall survival. Models built based on histologic subtype (astrocytoma, oligodendroglioma, or oligoastrocytoma) or pathologic diagnosis (A-II, A-III, O-II, O-III, AO-II, or AO-III) were adjusted for sex, age, and *IDH* status, whereas models built based on molecular parameters (*IDH*, *TP53*, *ATRX*, or 1p19q status) were adjusted only for sex and age. Molecular subtypes of astrocytoma were defined based on the presence of *IDH/TP53* mutations (*IDH/TP53* group), combined *IDH/TP53* mutations with *ATRX* loss (*IDH/TP53/ATRX* group), or *IDH* mutation and *ATRX* loss (*IDH/ATRX* group). Molecular oligodendroglioma

was defined as *IDH* mutated, 1p19q codeleted tumors. Logistic analysis was used to evaluate the association between *CDKN2A* loss by FISH and p16 labeling index by IHC, stratified by histologic subtype or pathologic diagnosis. Area under the curve was obtained from the receiver operating characteristic curve, which provides a graphic representation of the relationship between false-positive rate and true-positive rate (true-positive rate as defined by FISH). The optimal labeling index for p16 was extracted from the receiver operating characteristic table and used to dichotomize continuous p16 labeling index data into “deleted” and “intact” groups. Results with a value of  $p < 0.05$  were deemed significant.

## RESULTS

### Patient Characteristics

The clinical and pathologic characteristics of the 270 study subjects are summarized in Table 1. The percentages of astrocytomas and oligodendrogliomas were similar (41.9% and 38.5%, respectively); tumors with mixed histology accounted for 19.6% of cases. The median follow-up time was 10.6 years (mean, 10.5 years; range, 0.2–22.3 years), with 105 deaths (38.9%) and 165 patients (61.1%) alive at last follow-up.

### CDKN2A Loss Occurred More Frequently in Astrocytoma Than in Other Histologic Subtypes and Was Present in Relatively Similar Percentages in A-II and A-III

Examples of *CDKN2A* results by FISH are illustrated in Figure 1. The frequency of loss for each group is summarized

**TABLE 2.** Distribution of *CDKN2A*, *IDH*, *ATRX*, *TP53*, and 1p19q Status, by Pathologic Diagnosis, in Tumors of Patients With Glioma From the UCSF AGS

|               | All Cases | Diffuse Astrocytoma (A-II) | Anaplastic Astrocytoma (A-III) | Oligodendroglioma (O-II) | Anaplastic Oligodendroglioma (O-III) | Oligoastrocytoma (OA-II) | Anaplastic Oligoastrocytoma (OA-III) |
|---------------|-----------|----------------------------|--------------------------------|--------------------------|--------------------------------------|--------------------------|--------------------------------------|
| <i>CDKN2A</i> |           |                            |                                |                          |                                      |                          |                                      |
| Intact        | 159 (63)  | 26 (55)                    | 30 (49)                        | 57 (77)                  | 16 (73)                              | 25 (63)                  | 5 (56)                               |
| Deleted       | 94 (37)   | 21 (45)                    | 31 (51)                        | 17 (23)                  | 6 (27)                               | 15 (38)                  | 4 (44)                               |
| Total         | 253       | 47                         | 61                             | 74                       | 22                                   | 40                       | 9                                    |
| <i>IDH</i>    |           |                            |                                |                          |                                      |                          |                                      |
| Wild type     | 65 (24)   | 10 (21)                    | 26 (41)                        | 9 (11)                   | 8 (33)                               | 8 (19)                   | 4 (36)                               |
| Mutated       | 202 (76)  | 37 (79)                    | 37 (59)                        | 71 (89)                  | 16 (67)                              | 34 (81)                  | 7 (64)                               |
| Total         | 267       | 47                         | 63                             | 80                       | 24                                   | 42                       | 11                                   |
| <i>ATRX</i>   |           |                            |                                |                          |                                      |                          |                                      |
| Intact        | 156 (60)  | 22 (47)                    | 24 (39)                        | 68 (86)                  | 20 (87)                              | 18 (44)                  | 4 (36)                               |
| Lost          | 106 (40)  | 25 (53)                    | 37 (61)                        | 11 (14)                  | 3 (13)                               | 23 (56)                  | 7 (64)                               |
| Total         | 262       | 47                         | 61                             | 79                       | 23                                   | 41                       | 11                                   |
| <i>TP53</i>   |           |                            |                                |                          |                                      |                          |                                      |
| Wild type     | 107 (63)  | 9 (31)                     | 24 (48)                        | 42 (89)                  | 14 (82)                              | 13 (65)                  | 5 (63)                               |
| Mutated       | 64 (37)   | 20 (69)                    | 26 (52)                        | 5 (11)                   | 3 (18)                               | 7 (35)                   | 3 (38)                               |
| Total         | 171       | 29                         | 50                             | 47                       | 17                                   | 20                       | 8                                    |
| 1p19q         |           |                            |                                |                          |                                      |                          |                                      |
| Intact        | 65 (42)   | NA                         | NA                             | 19 (25)                  | 5 (23)                               | 29 (74)                  | 8 (89)                               |
| Codeleted     | 89 (58)   |                            |                                | 58 (75)                  | 17 (77)                              | 10 (26)                  | 1 (11)                               |
| Total         | 154       |                            |                                | 77                       | 22                                   | 39                       | 9                                    |

Data are presented as n (%).

NA, 1p19q data not available for tumors classified histologically as astrocytoma.

**TABLE 3.** Association of CDKN2A Loss by FISH With Overall Survival Stratified by Histologic Subtype, Pathologic Diagnosis, and Molecular Subtype Using Cox Proportional Hazards Models in Patients With Glioma From the UCSF AGS

|                               | CDKN2A Intact |    |                                 |      | CDKN2A Deleted |    |                                 |      | Unadjusted |          |         |     | Adjusted for Age and Sex |         |    |         |
|-------------------------------|---------------|----|---------------------------------|------|----------------|----|---------------------------------|------|------------|----------|---------|-----|--------------------------|---------|----|---------|
|                               | No. Deceased  |    | Median Overall Survival (years) |      | No. Deceased   |    | Median Overall Survival (years) |      | HR         |          | 95% CI  |     | p Value                  |         | HR |         |
|                               | n             |    |                                 |      | n              |    |                                 |      |            |          |         |     |                          |         |    | p Value |
| All cases*                    | 159           | 56 | 10.3                            | 11.8 | 94             | 42 | 8.8                             | 7.2  | 1.7        | 1.1–2.5  | 0.01†   | 1.6 | 1.0–2.4                  | 0.03    |    |         |
| Astrocytoma*                  | 56            | 23 | 8.7                             | 9.5  | 52             | 31 | 5.5                             | 4.4  | 2.6        | 1.5–4.6  | 0.0008† | 2.0 | 1.1–3.5                  | 0.02    |    |         |
| Oligodendroglioma*            | 73            | 20 | 11.1                            | 15.4 | 19             | 4  | 7.0                             |      | 0.7        | 0.2–1.7  | 0.4     | 0.7 | 0.2–2.00                 | 0.5     |    |         |
| Oligoastrocytoma*             | 30            | 13 | 9.8                             | 10.6 | 23             | 7  | 11.5                            | 17.2 | 0.9        | 0.3–2.2  | 0.7     | 0.8 | 0.3–2.4                  | 0.7     |    |         |
| A-II*                         | 26            | 9  | 10.2                            | 12.8 | 21             | 9  | 6.6                             | 6.4  | 3.9        | 1.4–11.2 | 0.01†   | 2.7 | 0.8–8.8                  | 0.1     |    |         |
| A-III*                        | 30            | 14 | 5.0                             | 6.9  | 31             | 22 | 4.7                             | 3.3  | 2.1        | 1.1–4.2  | 0.03†   | 1.8 | 0.8–3.6                  | 0.1     |    |         |
| O-II*                         | 57            | 14 | 9.4                             | 11.8 | 17             | 2  | 7.6                             | NA   | 0.4        | 0.07–1.6 | 0.3     | 0.4 | 0.07–1.5                 | 0.2     |    |         |
| O-III*                        | 16            | 6  | 11.2                            | 15.4 | 6              | 2  | 1.9                             | NA   | 1.4        | 0.2–6.6  | 0.7     | 1.6 | 0.2–9.9                  | 0.6     |    |         |
| OA-II*                        | 25            | 12 | 9.6                             | 10.6 | 15             | 5  | 12.3                            | 17.2 | 0.7        | 0.2–2.0  | 0.5     | 1.0 | 0.3–3.1                  | 0.9     |    |         |
| OA-III*                       | 5             | 1  | 1.0                             | NA   | 4              | 2  | 3.4                             | 3.7  | 2.8        | 0.3–60.0 | 0.4     | 0.2 | 0.0004–21.2              | 0.6     |    |         |
| IDH/TP53 mutated, ATRX lost   | 21            | 10 | 10.2                            | 12.9 | 21             | 14 | 6.4                             | 4.8  | 3.3        | 1.4–8.8  | 0.008†  | 3.4 | 1.4–8.4                  | 0.008†  |    |         |
| IDH/TP53 mutated              | 28            | 12 | 10.6                            | 12.8 | 22             | 15 | 6.3                             | 4.8  | 4.3        | 1.8–10.1 | 0.001†  | 4.4 | 1.8–10.3                 | 0.0008† |    |         |
| IDH mutated, ATRX lost        | 49            | 19 | 9.6                             | 9.2  | 39             | 18 | 8.7                             | 7.8  | 1.6        | 0.8–3.0  | 0.2     | 1.6 | 0.8–3.0                  | 0.2     |    |         |
| IDH mutated, 1p19q codeleted‡ | 56            | 16 | 6.2                             | 10.6 | 16             | 0  | NA                              | NA   | NA         | NA       | NA      | NA  | NA                       | NA      |    |         |

\*Hazard ratios for histologic groups and pathologic diagnosis were adjusted for IDH mutation status in addition to age and sex.

†Statistical significance at  $p = 0.05$ .

‡These tumors were also ATRX intact.

NA, median survival is not available because of lack of events.

in Table 2 and illustrated in Figure, Supplemental Digital Content 1, <http://links.lww.com/NEN/A727>. Astrocytomas demonstrated the highest frequency of *CDKN2A* loss (astrocytoma, 52 of 108 cases [55.3%]; oligodendroglioma, 23 of 96 cases [24.5%]; oligoastrocytoma, 19 of 49 cases [20.2%];  $p = 0.006$ , chi-square test). No significant difference in the relative percentages of deleted cases in A-II versus A-III tumors was observed (A-II, 21 of 47 cases [44.7%]; A-III, 31 of 61 cases [50.8%];  $p = 0.6$ , Fisher exact test).

The results for p16 expression by IHC are summarized in Table, Supplemental Digital Content 2, <http://links.lww.com/NEN/A728>. The p16 labeling index was highly variable across cases within a given histopathologic group.

### CDKN2A Loss Was Associated With Poorer Survival in Astrocytomas But Not in Oligodendrogliomas or Oligoastrocytomas

As hypothesized, *CDKN2A* loss determined by FISH was associated with significantly worse overall survival in

Grade II and Grade III gliomas after adjusting for age, sex, and *IDH* mutation (hazard ratio [HR], 1.6; 95% confidence interval [CI], 1.0–2.4;  $p = 0.03$ ) (Table 3). This result was mostly related to a strong adverse effect of *CDKN2A* loss on patients with astrocytoma (HR, 2.0; 95% CI, 1.1–3.5) (Table 3; Figs. 2A–D). Results were similar for Grade II and Grade III astrocytomas (Table 3). There were nonsignificant inverse associations between *CDKN2A* loss and overall survival among patients with oligodendroglioma or oligoastrocytoma (Table 3). Thus, *CDKN2A* loss was associated with poor survival among patients with astrocytoma, but this effect was not observed among patients with oligodendroglioma or oligoastrocytoma.

Logistic analysis demonstrated a poor association between *CDKN2A* deletion by FISH and p16 expression by IHC (Table, Supplemental Digital Content 3, <http://links.lww.com/NEN/A729>). Furthermore, loss of p16 expression by IHC was weakly associated with poor overall survival in lower-grade (Grades II and III) gliomas (Table, Supplemental Digital Content 4, <http://links.lww.com/NEN/A730>).

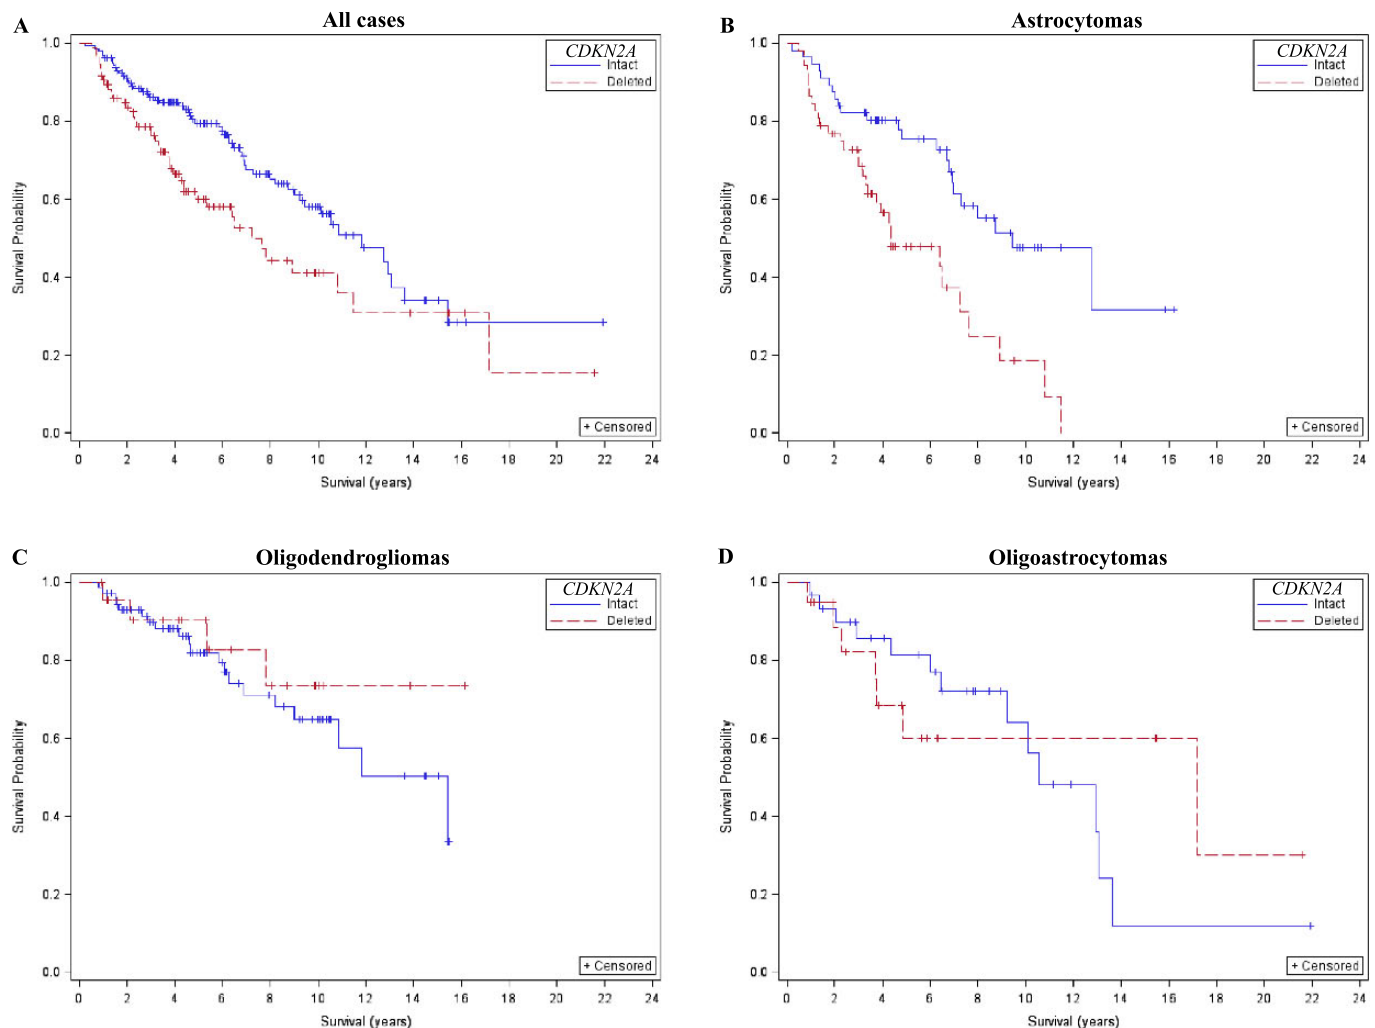

**FIGURE 2.** Effects of *CDKN2A* loss on overall survival in histologically classified lower-grade (WHO Grades II and III) gliomas. *CDKN2A* loss was associated with worse overall survival in lower-grade gliomas not stratified by histology (**A**) and in astrocytomas (**B**), but not in oligodendrogliomas (**C**) or oligoastrocytomas (**D**).

## CDKN2A Loss Was Strongly Associated With Poor Survival in Certain Molecular Subsets of Astrocytoma

As an alternative to using histologic classification, we evaluated the effects of *CDKN2A* loss on the overall survival of certain molecular subsets of Grade II to Grade III astrocytomas, defined as *IDH* mutated tumors with both *TP53* mutation and ATRX loss (termed *IDH/TP53/ATRX* group), or combined with either *TP53* mutation (termed *IDH/TP53* group) or ATRX loss (termed *IDH/ATRX* group) (Table 2; Figure, Supplemental Digital Content 1, <http://links.lww.com/NEN/A727>). The co-occurrence of *IDH*, *TP53*, and ATRX alterations is provided in Table 4. Among 123 *IDH* mutated tumors with known *TP53* and ATRX status, 42 cases (34.1%) harbored both mutation in *TP53* and loss of ATRX expression; 21 cases (17.1%) harbored only ATRX loss; and 9 cases (7.3%) harbored only *TP53* mutation (Table 4). Fifty-one cases (41.5%) showed no alteration in either *TP53* or ATRX, of which 38 cases (74.5%) were 1p19q codeleted “molecular oligodendroglioma.” Overall,

a strong association between occurrence of *TP53* mutation and ATRX loss was noted ( $p < 0.0001$ , Fisher exact test). Similarly, we found a strong association between the occurrence of *IDH* mutation and ATRX loss both in *IDH* mutated cases with 1p19q intact status ( $p = 0.0004$ , Fisher exact test) (Table 4) and in *IDH* mutated cases not evaluated for 1p19q because they were classic astrocytomas on histopathology ( $p < 0.0001$ , Fisher exact test) (Table 4); the latter was similar to observations made in *IDH/TP53* mutated cases. These data support a strong association between the occurrence of *IDH* mutation and *TP53* mutation and/or ATRX loss in Grade II to Grade III astrocytomas.

In the *IDH/TP53/ATRX* group, *CDKN2A* loss was associated with worse overall survival after adjusting for age and sex (HR, 3.4; 95% CI, 1.4–8.4;  $p = 0.008$ ) (Fig. 3A; Table 3). *CDKN2A* loss was strongly associated with poor survival in *IDH/TP53* mutated tumors (HR, 4.4; 95% CI, 1.8–10.3;  $p = 0.0008$ ) (Fig. 3B; Table 3), but this association did not reach statistical significance in the *IDH/ATRX* group (HR, 1.6; 95%

**TABLE 4.** Distribution of *IDH/TP53* Mutation Status and ATRX Loss of Expression in Tumors of Patients From the UCSF AGS

| <i>IDH</i> Mutated Cases With Both ATRX and <i>TP53</i> Data Available (n = 123) |             |            |                           |
|----------------------------------------------------------------------------------|-------------|------------|---------------------------|
| ATRX                                                                             | <i>TP53</i> | n (%)      | Fisher Exact Test p Value |
| Intact                                                                           | Wild type   | 51 (41.5)  | <0.0001*                  |
| Intact                                                                           | Mutated     | 9 (7.3)    |                           |
| Lost                                                                             | Wild type   | 21 (17.1)  |                           |
| Lost                                                                             | Mutated     | 42 (34.1)  |                           |
| Total                                                                            |             | 123        |                           |
| Cases With Both <i>IDH</i> and ATRX Data Available (n = 259)                     |             |            |                           |
| <i>IDH</i>                                                                       | ATRX        | n (%)      | Fisher Exact Test p Value |
| Wild type                                                                        | Intact      | 47 (18.1)  | 0.0017*                   |
| Wild type                                                                        | Lost        | 14 (5.4)   |                           |
| Mutated                                                                          | Intact      | 108 (41.7) |                           |
| Mutated                                                                          | Lost        | 90 (34.7)  |                           |
| Total                                                                            |             | 259        |                           |
| Cases With Both <i>IDH</i> and ATRX Data Available (Stratified by 1p19q Status)  |             |            |                           |
| <i>IDH</i>                                                                       | ATRX        | n (%)      | Fisher Exact Test p Value |
| 1p19q codeleted (n = 87)                                                         |             |            |                           |
| Wild type                                                                        | Intact      | 5 (5.7)    | 0.3                       |
| Wild type                                                                        | Lost        | 1 (1.1)    |                           |
| Mutated                                                                          | Intact      | 78 (89.7)  |                           |
| Mutated                                                                          | Lost        | 3 (3.4)    |                           |
| Total                                                                            |             | 87         |                           |
| 1p19q intact (n = 63)                                                            |             |            |                           |
| Wild type                                                                        | Intact      | 16 (25.4)  | 0.0004*                   |
| Wild type                                                                        | Lost        | 7 (11.1)   |                           |
| Mutated                                                                          | Intact      | 9 (14.3)   |                           |
| Mutated                                                                          | Lost        | 31 (49.2)  |                           |
| Total                                                                            |             | 63         |                           |
| 1p19q not assayed (tumors histologically classified as astrocytoma) (n = 101)    |             |            |                           |
| Wild type                                                                        | Intact      | 26 (25.7)  | <0.0001*                  |
| Wild type                                                                        | Lost        | 6 (5.9)    |                           |
| Mutated                                                                          | Intact      | 17 (16.8)  |                           |
| Mutated                                                                          | Lost        | 52 (51.5)  |                           |
| Total                                                                            |             | 101        |                           |

\*Statistical significance at  $p = 0.05$ .

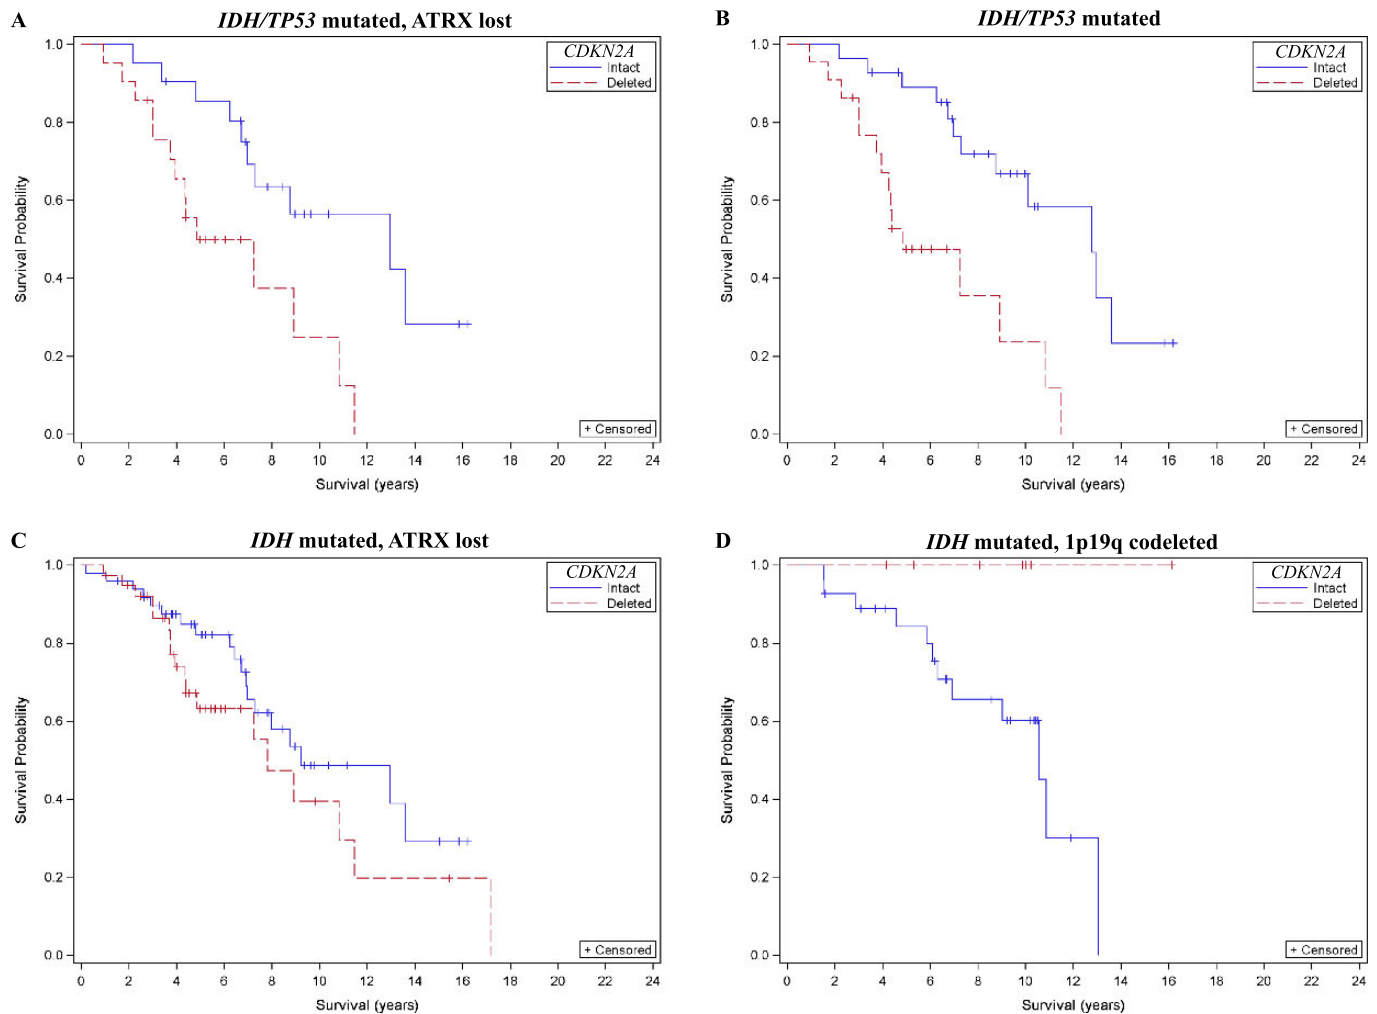

**FIGURE 3.** Effects of *CDKN2A* loss on overall survival in subsets of molecularly defined astrocytomas and oligodendrogliomas. *CDKN2A* loss by FISH was associated with worse overall survival in *IDH/TP53* mutated tumors with *ATRX* loss (*IDH/TP53/ATRX* group) (**A**) and *IDH/TP53* mutated tumors (*IDH/TP53* group) (**B**) but not in *IDH* mutated tumors with *ATRX* loss (*IDH/ATRX* group) (**C**). (**D**) Patients with molecularly defined oligodendrogliomas in the *CDKN2A* deleted group seemed to have improved survival; however, the statistical significance of the association between *CDKN2A* loss and overall survival could not be accurately assessed because none of the subjects in the *CDKN2A* deleted group died during the follow-up period.

CI, 0.8–3.0;  $p = 0.2$ ) (Fig. 3C; Table 3). The 2 groups overlapped partially, such that of the 115 *IDH* mutated cases with known status for *CDKN2A*, *TP53*, and *ATRX*, 42 cases (36.5%) showed *ATRX* loss and *TP53* mutation, 7 cases (6.1%) showed intact *ATRX* and mutated *TP53*, and 20 cases (17.4%) showed *ATRX* loss without *TP53* mutation (Fig. 4). The *IDH/TP53* and *IDH/ATRX* groups contained a similar proportion of Grade II and Grade III tumors. Furthermore, subjects in each group were of nearly identical (mean  $\pm$  SE) age at the time of diagnosis (*IDH/TP53*,  $36.5 \pm 1.3$  years; *IDH/ATRX*,  $36.4 \pm 1.2$  years). Thus, in both histologically and molecularly defined astrocytoma (in particular, in astrocytomas defined by the presence of *IDH* and *TP53* mutations), *CDKN2A* loss was strongly associated with poor survival after adjusting for age and sex.

With respect to molecularly defined oligodendrogliomas, the effects of *CDKN2A* loss on *IDH* mutated, 1p19q codeleted tumors were examined (Fig. 3D). This group consisted of 16 patients with no deaths (Table 3); therefore, a comparison

using Cox proportional hazards regression would not be reliable, and estimates of the association between *CDKN2A* loss and survival in molecular oligodendroglioma could not be determined.

## DISCUSSION

This study demonstrates an independent adverse effect of *CDKN2A* loss on the overall survival of patients with lower-grade (WHO Grades II and III) astrocytomas after accounting for *IDH* mutation, age, and sex. Tumors for 270 patients were classified and graded according to WHO criteria by expert neuropathologists, and molecular data for *CDKN2A*, *IDH*, *TP53*, *ATRX*, and 1p19q were included. Although most patients (61.1%) were alive at censoring, survival analysis yielded unequivocal results with good concordance between histologic and molecular analyses, in particular for the molecular subset of astrocytoma defined by



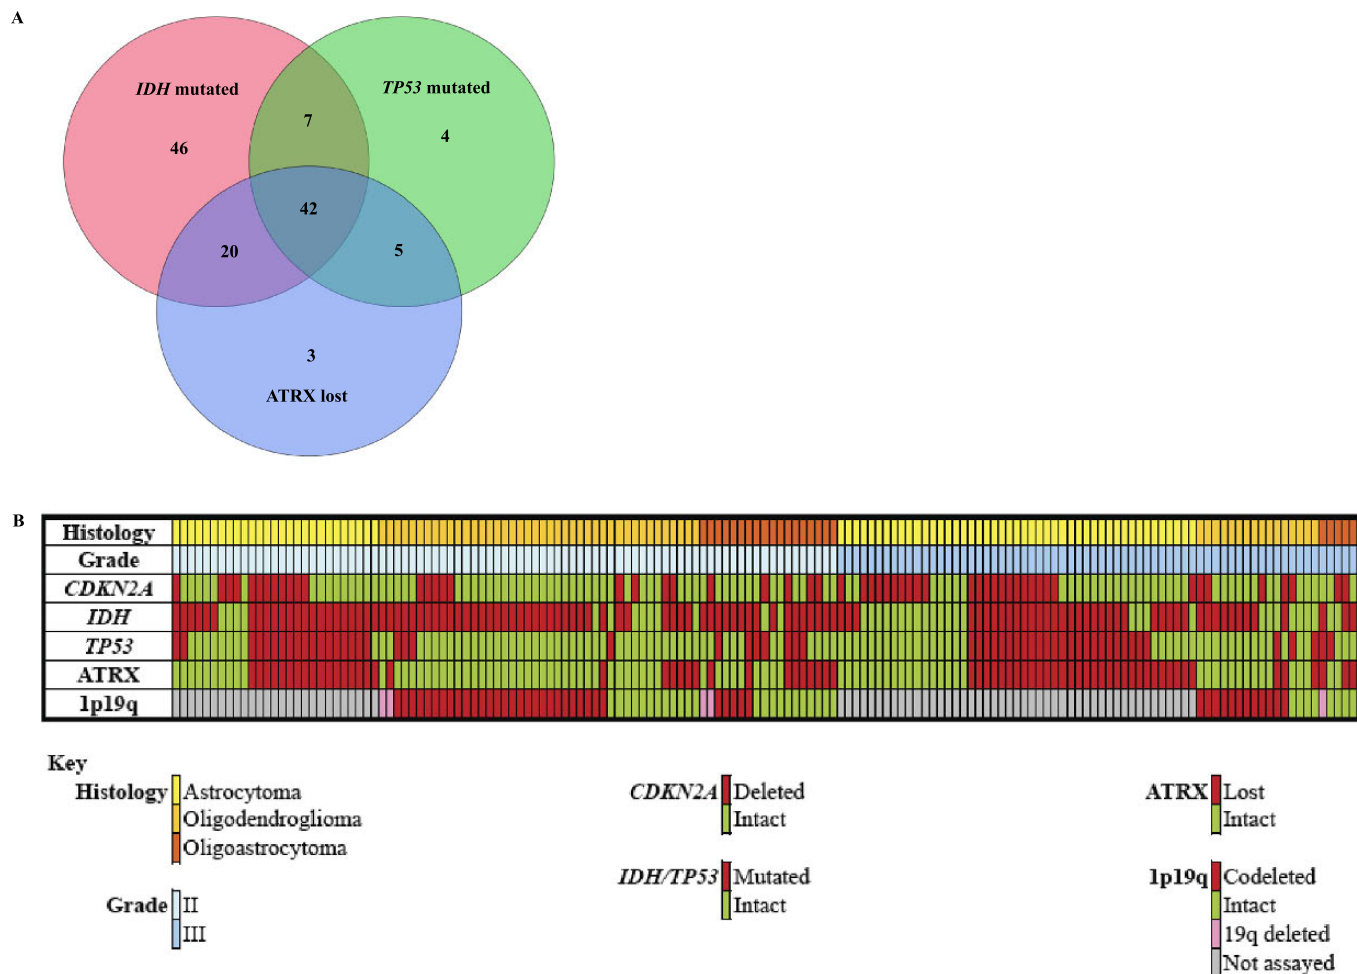

**FIGURE 4.** Overlap between *IDH/TP53* and *IDH/ATRX* groups. **(A)** The astrocytoma groups defined by *IDH/TP53* mutation (*IDH/TP53* group) or *IDH* mutated tumors with *ATRX* loss (*IDH/ATRX* group) showed partial overlap such that, among 115 *IDH* mutated cases with known status for *CDKN2A*, *IDH*, *TP53*, and *ATRX*, 42 cases (36.5%) showed *ATRX* loss and *TP53* mutation, 7 cases (6.1%) had mutated *TP53* and intact *ATRX*, and 20 cases (17.4%) had intact *ATRX* and wild-type *TP53*. **(B)** OncoPrint of molecular parameters grouped by histology and grade.

*IDH/TP53* mutation. Unfortunately, a conclusion for molecular oligodendrogliomas could not be reached because of the absence of deaths in the *CDKN2A* deleted group. This analysis will require a follow-up interval longer than 10.9 years (median for the molecular oligodendroglioma subgroup included here).

In previous studies, loss of *CDKN2A* was associated with worse survival in both astrocytomas and oligodendrogliomas (27–33). This study shows that *CDKN2A* loss is associated with worse survival in astrocytomas, but this effect was not observed in oligodendrogliomas. The disagreement between the findings here and those of prior studies may stem from the powerful effect of *IDH* mutation on survival, which was not considered previously because the role of *IDH* mutation in gliomas was not yet known. However, we cannot exclude other factors, such as limited statistical power, in the oligodendroglioma subgroup because there were few deaths among these patients in our cohort.

Most cases of *CDKN2A* loss in infiltrating gliomas are homozygous deletions in the 9p21 region (17–20). Such ge-

nomic alterations would be predicted to result in loss of p16 protein expression. Surprisingly, the expression of p16 by IHC correlated poorly with *CDKN2A* deletion by FISH. Several factors could explain this discrepancy. For example, although hemizygous losses are relatively straightforward to detect by FISH, the loss of p16 expression might be minimal and might result in no significant detectable change in p16 expression by IHC. Indeed, in relating our findings to those of The Cancer Genome Atlas lower-grade glioma data set (publically available at <http://www.cbioportal.org/>), a significant decrease in *CDKN2A* messenger RNA expression was observed only for homozygous deletion of the *CDKN2A* gene but not for hemizygous deletion (Figure, Supplemental Digital Content 5, <http://links.lww.com/NEN/A731>). Alternatively, *CDKN2A* gene expression may be lost through promoter hypermethylation (42, 43) or point mutations (26), which are seen in a small subset of cases but are undetectable by FISH. If both copies of *CDKN2A* were inactivated by either mechanism, p16 expression by IHC would be expected to decrease, whereas *CDKN2A* status by FISH would be “intact.”

Regardless of the reasons for the discrepancy, it should be emphasized that the strong association between *CDKN2A* loss by FISH and poor survival in astrocytoma, as opposed to the weak association between p16 loss of expression by IHC and poor survival in astrocytoma, argues strongly in favor of using FISH to evaluate the status of *CDKN2A* when prognosticating astrocytomas.

The analysis of molecular subsets of astrocytomas revealed a strong association between *CDKN2A* loss and poor survival in patients harboring *IDH/TP53* mutations, but a weaker effect was observed in the subset of molecular astrocytomas defined by *IDH* mutation and *ATRX* loss of expression. The concordance between *ATRX* loss and *TP53* mutation in our study (76%) was similar to that reported in previous studies on *ATRX* (range, 71%–78%) (8, 10, 44). Although a small fraction of cases with missense mutations (~10%) may be missed by IHC, most mutations in *ATRX* result in loss of protein expression (9, 44). Prior data strongly suggested that biologic differences may exist between the *IDH/TP53* group and the *IDH/ATRX* group (9, 44–46). For example, other pathways of gliomagenesis, including telomerase-dependent mechanisms (47, 48), could predominate in *IDH/TP53* mutated tumors with intact *ATRX*. Alternatively, mutations in other genes involved in the alternative lengthening of telomeres pathway could be present. Future studies focusing on these questions should help clarify this issue.

Whether the combination of *IDH* mutation and *TP53* mutation or the combination of *IDH* mutation and *ATRX* loss of expression should be considered the “gold standard” for defining molecular astrocytomas in the clinical setting remains unresolved. The strong association between *CDKN2A* loss and poor survival in *IDH/TP53* astrocytomas reported here relied on the determination of *CDKN2A* status by FISH and *TP53* mutation by sequencing. The poor correlation between *CDKN2A* status by FISH and p16 loss by IHC shows that the assay of choice can play a crucial role. Because molecular information on these markers will be an integral component of standard integrated diagnoses in clinical reports, as recently proposed by the WHO (3), our findings suggest that comparative studies using both sequencing and IHC methods should be conducted to better define the standard of care and to avoid confusion.

In conclusion, our study demonstrates that *CDKN2A* loss is highly prognostic in *IDH/TP53* mutated astrocytomas. Testing for *CDKN2A* loss could be a potentially useful “grading” biomarker for this adult glioma subtype.

## ACKNOWLEDGMENT

We thank Cynthia Cowdrey, King Chiu, Yunita Lim, Sunny Evans, Tanya Zaitsev, and Yuri Murphy for assistance with tissue histology and IHC. We thank Dr Kenneth Aldape and Tarik Tihan for assisting in the neuropathologic review of cases.

## REFERENCES

1. Dolecek TA, Propp JM, Stroup NE, Kruchko C. CBTRUS statistical report: Primary brain and central nervous system tumors diagnosed in the United States in 2005–2009. *Neuro Oncol* 2012;14(Suppl 5):v1–49

2. Louis DN, Cavenee WK, Ohgaki H, et al. *WHO Classification of Tumours of the Central Nervous System*. Lyon, France: IARC Press, 2007
3. Louis DN, Perry A, Burger P, et al. International Society of Neuropathology—Haarlem consensus guidelines for nervous system tumor classification and grading. *Brain Pathol* 2014;24:429–35
4. Bourne TD, Schiff D. Update on molecular findings, management and outcome in low-grade gliomas. *Nat Rev Neurol* 2010;6:695–701
5. Parsons DW, Jones S, Zhang X, et al. An integrated genomic analysis of human glioblastoma multiforme. *Science* 2008;321:1807–12
6. Yan H, Parsons DW, Jin G, et al. IDH1 and IDH2 mutations in gliomas. *N Engl J Med* 2009;360:765–73
7. Hartmann C, Meyer J, Balss J, et al. Type and frequency of IDH1 and IDH2 mutations are related to astrocytic and oligodendroglial differentiation and age: A study of 1,010 diffuse gliomas. *Acta Neuropathol* 2009;118:469–74
8. Kannan K, Inagaki A, Silber J, et al. Whole-exome sequencing identifies *ATRX* mutation as a key molecular determinant in lower-grade glioma. *Oncotarget* 2012;3:1194–203
9. Heaphy CM, de Wilde RF, Jiao Y, et al. Altered telomeres in tumors with *ATRX* and *DAXX* mutations. *Science* 2011;333:425
10. Jiao Y, Killela PJ, Reitman ZJ, et al. Frequent *ATRX*, *CIC*, *FUBP1* and *IDH1* mutations refine the classification of malignant gliomas. *Oncotarget* 2012;3:709–22
11. Louis DN, Ohgaki H, Wiestler OD, et al. The 2007 WHO classification of tumours of the central nervous system. *Acta Neuropathol* 2007;114:97–109
12. Okamoto Y, Di Patre PL, Burkhard C, et al. Population-based study on incidence, survival rates, and genetic alterations of low-grade diffuse astrocytomas and oligodendrogliomas. *Acta Neuropathol* 2004;108:49–56
13. Watanabe T, Nakamura M, Kros JM, et al. Phenotype versus genotype correlation in oligodendrogliomas and low-grade diffuse astrocytomas. *Acta Neuropathol* 2002;103:267–75
14. Reifenberger G, Louis DN. Oligodendroglioma: Toward molecular definitions in diagnostic neuro-oncology. *J Neuropathol Exp Neurol* 2003; 62:111–26
15. Killela PJ, Reitman ZJ, Jiao Y, et al. TERT promoter mutations occur frequently in gliomas and a subset of tumors derived from cells with low rates of self-renewal. *Proc Natl Acad Sci U S A* 2013;110:6021–26
16. Sahm F, Reuss D, Koelsche C, et al. Farewell to oligoastrocytoma: In situ molecular genetics favor classification as either oligodendroglioma or astrocytoma. *Acta Neuropathol* 2014;128:551–59
17. Ohgaki H, Kleihues P. Genetic alterations and signaling pathways in the evolution of gliomas. *Cancer Sci* 2009;100:2235–41
18. Rasheed A, Herndon JE, Stenzel TT, et al. Molecular markers of prognosis in astrocytic tumors. *Cancer* 2002;94:2688–97
19. Perry A, Anderl K, Borell TJ, et al. Detection of p16, RB, CDK4, and p53 gene deletion and amplification by fluorescence in situ hybridization in 96 gliomas. *Am J Clin Pathol* 1999;112:801–9
20. Maruno M, Yoshimine T, Muhammad AK, Tokiyoshi K, Hayakawa T. Loss of heterozygosity of microsatellite loci on chromosome 9p in astrocytic tumors and its prognostic implications. *J Neurooncol* 1996;30:19–24
21. Ruas M, Peters G. The p16INK4a/CDKN2A tumor suppressor and its relatives. *Biochim Biophys Acta* 1998;1378:F115–77
22. Weinberg RA. The retinoblastoma protein and cell cycle control. *Cell* 1995;81:323–30
23. Sherr CJ, Roberts JM. CDK inhibitors: Positive and negative regulators of G1-phase progression. *Genes Dev* 1999;13:1501–12
24. He J, Olson JJ, James CD. Lack of p16INK4 or retinoblastoma protein (pRb), or amplification-associated overexpression of cdk4 is observed in distinct subsets of malignant glial tumors and cell lines. *Cancer Res* 1995; 55:4833–36
25. Watanabe T, Yokoo H, Yokoo M, Yonekawa Y, Kleihues P, Ohgaki H. Concurrent inactivation of RB1 and TP53 pathways in anaplastic oligodendrogliomas. *J Neuropathol Exp Neurol* 2001;60:1181–89
26. Ueki K, Ono Y, Henson JW, Efrid JT, von Deimling A, Louis DN. CDKN2/p16 or RB alterations occur in the majority of glioblastomas and are inversely correlated. *Cancer Res* 1996;56:150–53
27. Jeon YK, Park K, Park CK, Paek SH, Jung HW, Park SH. Chromosome 1p and 19q status and p53 and p16 expression patterns as prognostic indicators of oligodendroglial tumors: A clinicopathological study using fluorescence in situ hybridization. *Neuropathology* 2007;27:10–20
28. Bigner SH, Matthews MR, Rasheed BK, et al. Molecular genetic aspects of oligodendrogliomas including analysis by comparative genomic hybridization. *Am J Pathol* 1999;155:375–86

29. Perry A, Nobori T, Ru N, et al. Detection of p16 gene deletions in gliomas: A comparison of fluorescence in situ hybridization (FISH) versus quantitative PCR. *J Neuropathol Exp Neurol* 1997;56:999–1008
30. Fuller CE, Schmidt RE, Roth KA, et al. Clinical utility of fluorescence in situ hybridization (FISH) in morphologically ambiguous gliomas with hybrid oligodendroglial/astrocytic features. *J Neuropathol Exp Neurol* 2003;62:1118–28
31. Bortolotto S, Chiadò-Piat L, Cavalla P, et al. CDKN2A/p16 inactivation in the prognosis of oligodendrogliomas. *Int J Cancer* 2000;88:554–57
32. Cairncross JG, Ueki K, Zlatescu MC, et al. Specific genetic predictors of chemotherapeutic response and survival in patients with anaplastic oligodendrogliomas. *J Natl Cancer Inst* 1998;90:1473–79
33. Miettinen H, Kononen J, Sallinen P, et al. CDKN2/p16 predicts survival in oligodendrogliomas: Comparison with astrocytomas. *J Neurooncol* 1999;41:205–11
34. Wick W, Hartmann C, Engel C, et al. NOA-04 randomized phase III trial of sequential radiochemotherapy of anaplastic glioma with procarbazine, lomustine, and vincristine or temozolomide. *J Clin Oncol* 2009;27:5874–80
35. Shibahara I, Sonoda Y, Kanamori M, Saito R, Kumabe T, Tominaga T. New insights into glioma classification based on isocitrate dehydrogenase 1 and 2 gene status. *Brain Tumor Pathol* 2011;28:203–8
36. Walsh KM, Codd V, Smirnov IV, et al. Variants near TERT and TERC influencing telomere length are associated with high-grade glioma risk. *Nat Genet* 2014;46:731–35
37. Rice T, Zheng S, Decker PA, et al. Inherited variant on chromosome 11q23 increases susceptibility to IDH-mutated but not IDH-normal gliomas regardless of grade or histology. *Neuro Oncol* 2013;15:535–41
38. Christensen BC, Smith AA, Zheng S, et al. DNA methylation, isocitrate dehydrogenase mutation, and survival in glioma. *J Natl Cancer Inst* 2011;103:143–53
39. Wiencke JK, Aldape K, McMillan A, et al. Molecular features of adult glioma associated with patient race/ethnicity, age, and a polymorphism in O<sup>6</sup>-methylguanine-DNA-methyltransferase. *Cancer Epidemiol Biomarkers Prev* 2005;14:1774–83
40. Stacey SN, Sulem P, Jonasdottir A, et al. A germline variant in the TP53 polyadenylation signal confers cancer susceptibility. *Nat Genet* 2011;43:1098–103
41. Perry A, Fuller CE, Banerjee R, Brat DJ, Scheithauer BW. Ancillary FISH analysis for 1p and 19q status: Preliminary observations in 287 gliomas and oligodendroglioma mimics. *Front Biosci* 2003;8:a1–a9
42. Costello JF, Berger MS, Huang HS, Cavenee WK. Silencing of p16/CDKN2 expression in human gliomas by methylation and chromatin condensation. *Cancer Res* 1996;56:2405–10
43. Alves MK, Faria MH, Neves Filho EH, et al. CDKN2A promoter hypermethylation in astrocytomas is associated with age and sex. *Int J Surg* 2013;11:549–53
44. Liu XY, Gerges N, Korshunov A, et al. Frequent ATRX mutations and loss of expression in adult diffuse astrocytic tumors carrying IDH1/IDH2 and TP53 mutations. *Acta Neuropathol* 2012;124:615–25
45. Jiao Y, Shi C, Edil BH, et al. DAXX/ATRX, MEN1, and mTOR pathway genes are frequently altered in pancreatic neuroendocrine tumors. *Science* 2011;331:1199–203
46. Schwartzentruber J, Korshunov A, Liu XY, et al. Driver mutations in histone H3.3 and chromatin remodelling genes in paediatric glioblastoma. *Nature* 2012;482:226–31
47. Shay JW, Wright WE. Role of telomeres and telomerase in cancer. *Semin Cancer Biol* 2011;21:349–53
48. Walsh KM, Rice T, Decker PA, et al. Genetic variants in telomerase-related genes are associated with an older age at diagnosis in glioma patients: Evidence for distinct pathways of gliomagenesis. *Neuro Oncol* 2013;15:1041–47
